# Supplementary material for: Total Metabolic Tumor Volume on 18F-FDG PET/CT Is a Useful Prognostic Biomarker for Patients with Extensive Small-Cell Lung Cancer Undergoing First-Line Chemo-Immunotherapy
Source: MDPI journal article supplement (doi:10.3390/cancers15082223), 2023-04-10

# Total metabolic tumor volume on 18F-FDG PET/CT is a useful prognostic biomarker for patients with extensive small cell lung cancer undergoing first-line chemo-immunotherapy

## SUPPLEMENT

### SUPPLEMENTAL TABLES ..... 2

*Table S1:* Area under the curve (AUC) for the prediction of PFS and OS at 6, 12, and 18 months in the chemo-immunotherapy (CIT) and chemotherapy (CT) groups based on total metabolic tumor volume (TMTV) and derived neutrophil-to-liver ratio (dNLR) .....2

*Table S2:* Tests for the additional prognostic value of TMTV and dNLR in the chemo-immunotherapy group .....3

*Table S3:* Estimated Overall Survival (OS) probability at 6, 12, and 18 months in the chemo-immunotherapy (CIT) cohort based on total metabolic tumor volume (TMTV) and liver metastases (LM) status .....4

*Table S4:* Estimated Overall Survival (OS) probability at 6, 12, and 18 months in the chemotherapy (CT) cohort based on total metabolic tumor volume (TMTV) and liver metastases (LM) status.....5

### SUPPLEMENTAL FIGURES..... 6

*Figure S1:* Predictiveness curves for TMTV (A) and Tumor SUVmax (B) for 6-month-PFS...6

*Figure S2:* Relationships between FDG uptake of tumor (tumor SUVmax), metabolic tumor burden (TMTV) and clinic-biological parameters (age, leukocytes, neutrophils, lymphocytes and dNLR) evaluated by Spearman's correlation coefficients .....7

*Figure S3:* Kaplan-Meier curves of Overall Survival (OS) (A) and Progression-Free Survival (PFS) (B) according to the derived Neutrophil-to-Lymphocyte Ratio (dNLR) in the chemotherapy (CT) cohort .....8

*Figure S4:* Kaplan-Meier curves of Progression-Free Survival (PFS) based on total metabolic tumor volume (TMTV) and liver metastases (LM) status in the chemo-immunotherapy (CIT) cohort (A) and in the chemotherapy (CT) cohort (B) .....9

**Table S1: Area under the curve (AUC) for the prediction of PFS and OS at 6, 12, and 18 months in the chemo-immunotherapy (CIT) and chemotherapy (CT) groups based on total metabolic tumor volume (TMTV) and derived neutrophil-to-liver ratio (dNLR).**

| AUC (95%CI)                                                                                                                                                       | PFS              |                  |                  | OS               |                  |                  |
|-------------------------------------------------------------------------------------------------------------------------------------------------------------------|------------------|------------------|------------------|------------------|------------------|------------------|
|                                                                                                                                                                   | 6 months         | 12 months        | 18 months        | 6 months         | 12 months        | 18 months        |
| <b>CHEMO-IMMUNOTHERAPY GROUP</b>                                                                                                                                  |                  |                  |                  |                  |                  |                  |
| dNLR                                                                                                                                                              | 0.55 (0.35-0.74) | 0.70 (0.44-0.95) | 0.66 (0.33-1.00) | 0.85 (0.61-1.00) | 0.72 (0.54-0.90) | 0.62 (0.40-0.82) |
| TMTV                                                                                                                                                              | 0.59 (0.40-0.79) | 0.63 (0.35-0.90) | 0.62 (0.45-0.78) | 0.88 (0.73-1.00) | 0.61 (0.42-0.80) | 0.63 (0.44-0.83) |
| <b>CHEMOTHERAPY GROUP</b>                                                                                                                                         |                  |                  |                  |                  |                  |                  |
| dNLR                                                                                                                                                              | 0.61 (0.39-0.82) | 0.58 (0.38-0.78) | 0.58 (0.39-0.79) | 0.67 (0.41-0.88) | 0.70 (0.51-0.89) | 0.77 (0.60-0.94) |
| TMTV                                                                                                                                                              | 0.63 (0.43-0.83) | 0.61 (0.40-0.81) | 0.61 (0.41-0.82) | 0.64 (0.40-0.87) | 0.56 (0.36-0.77) | 0.63 (0.36-0.91) |
| <i>Abbreviations: progression-free survival (PFS), overall survival (OS), total metabolic tumor volume (TMTV), derived neutrophil-to-lymphocyte ratio (dNLR).</i> |                  |                  |                  |                  |                  |                  |

**Table S2: Tests for the additional prognostic value of TMTV and dNLR in the chemo-immunotherapy group.**

*Legend: Likelihood ratio test and p values were generated comparing multivariable Cox proportional hazard models with and without the addition of TMTV (> 241 cm<sup>3</sup> versus ≤ 241 cm<sup>3</sup>) or with and without dNLR (> 3 versus ≤ 3) in order to test for its additional prognostic value. The multivariable Cox model was generated with backward elimination for Cox regression. The multivariable model for OS included the following clinical variables: age (≥ 70 vs < 70 years), dNLR (>3 vs ≤ 3), liver metastases (yes vs no) and TMTV (> 241 cm<sup>3</sup> versus ≤ 241 cm<sup>3</sup>). The multivariable model for PFS included the following clinical variables: dNLR (>3 vs ≤ 3) and TMTV (> 241 cm<sup>3</sup> versus ≤ 241 cm<sup>3</sup>).*

| CHEMO-IMMUNOTHERAPY GROUP                        |             |            |             |            |
|--------------------------------------------------|-------------|------------|-------------|------------|
| Cox model variables                              | PFS         |            | OS          |            |
|                                                  | LR $\chi^2$ | LR p value | LR $\chi^2$ | LR p value |
| Multivariable model ( <u>with</u> TMTV and dNLR) | 6.9         | -          | 12.9        | -          |
| Multivariable model <u>without</u> TMTV          | 3.5         | 0.06       | 9.0         | 0.04       |
| Multivariable model <u>without</u> dNLR          | 3.8         | 0.08       | 8.3         | 0.03       |

*Abbreviations: likelihood ratio (LR), progression-free survival (PFS), overall survival (OS), total metabolic tumor volume (TMTV), derived neutrophil-to-lymphocyte ratio (dNLR).*

**Table S3: Estimated Overall Survival (OS) probability at 6, 12, and 18 months in the chemo-immunotherapy (CIT) cohort based on total metabolic tumor volume (TMTV) and liver metastases (LM) status.**

| Strata            | Time (months) | n risk | n event | Survival probability [95% CI] |
|-------------------|---------------|--------|---------|-------------------------------|
| High risk         | 6             | 6      | 2       | 0.63 [0.50–1.00]              |
|                   | 12            | 2      | 6       | 0.12 [0.02–0.78]              |
|                   | 18            | 0      | 8       | 0.00 [NA–NA]                  |
| Intermediate risk | 6             | 10     | 0       | 0.90 [0.73–1.00]              |
|                   | 12            | 5      | 5       | 0.51 [0.26–1.00]              |
|                   | 18            | 3      | 2       | 0.26 [0.08–0.84]              |
| Low risk          | 6             | 18     | 0       | 0.94 [0.84–1.00]              |
|                   | 12            | 11     | 7       | 0.60 [0.40–0.92]              |
|                   | 18            | 5      | 13      | 0.33 [0.16–0.68]              |

*Abbreviations: confidence interval (CI), not applicable (NA).*

**Table S4: Estimated Overall Survival (OS) probability at 6, 12, and 18 months in the chemotherapy (CT) cohort based on total metabolic tumor volume (TMTV) and liver metastases (LM) status.**

| Strata            | Time (months) | n risk | n event | Survival probability [95% CI] |
|-------------------|---------------|--------|---------|-------------------------------|
| High risk         | 6             | 6      | 1       | 0.71 [0.45–1.00]              |
|                   | 12            | 3      | 4       | 0.29 [0.09–0.92]              |
|                   | 18            | 1      | 6       | 0.14 [0.02–0.88]              |
| Intermediate risk | 6             | 9      | 1       | 0.80 [0.59–1.00]              |
|                   | 12            | 4      | 6       | 0.30 [0.12–0.77]              |
|                   | 18            | 1      | 9       | 0.10 [0.02–0.64]              |
| Low risk          | 6             | 12     | 3       | 0.73 [0.54–0.99]              |
|                   | 12            | 8      | 7       | 0.47 [0.27–0.80]              |
|                   | 18            | 4      | 11      | 0.27 [0.12–0.62]              |

*Abbreviations: confidence interval (CI).*

**Figure S1: Predictiveness curves for TMTV (A) and Tumor SUVmax (B) for 6-month-PFS.**

**A**

**Estimating the predictiveness curve of TMTV**

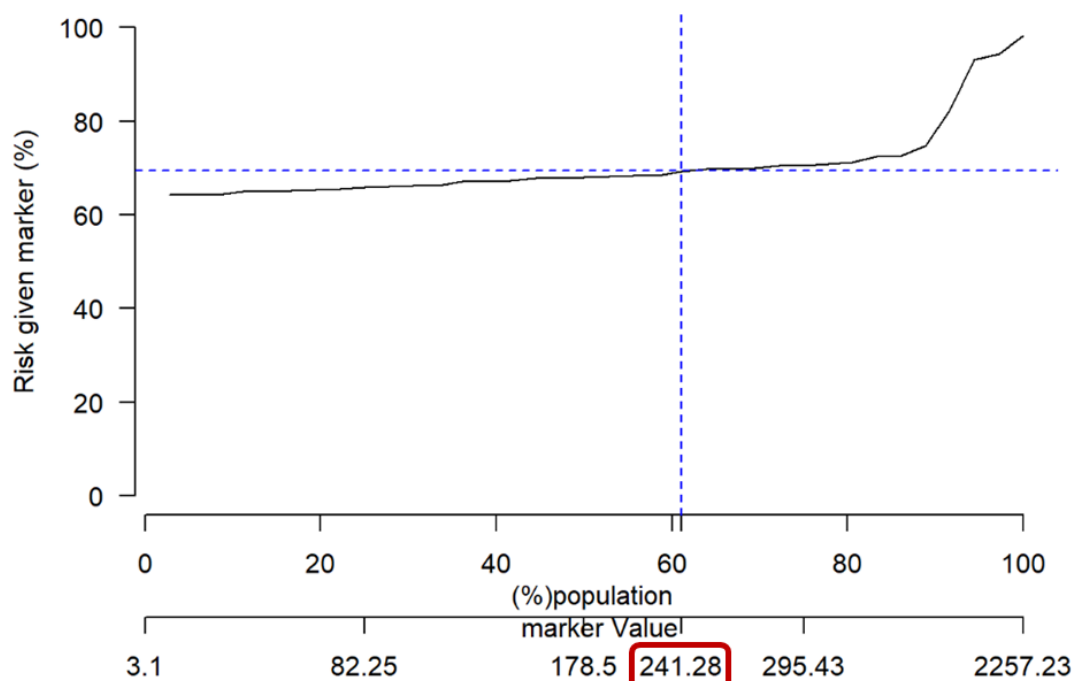

**B**

**Estimating the predictiveness curve of tumor SUVmax**

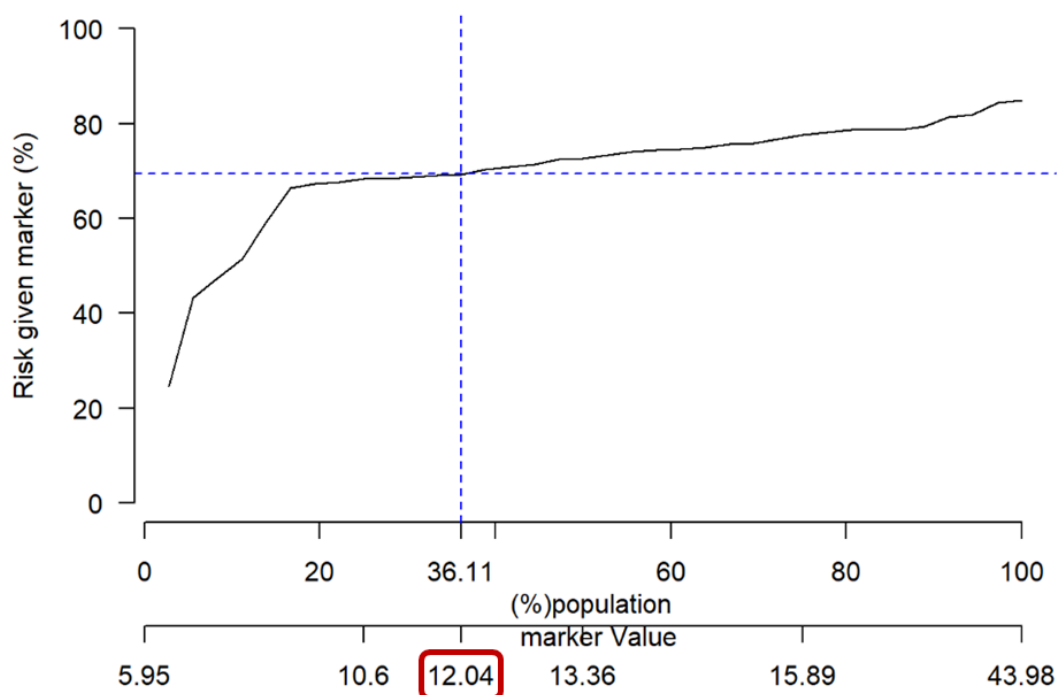

**Figure S2: Relationships between FDG uptake of tumor (tumor SUVmax), metabolic tumor burden (TMTV) and clinic-biological parameters (age, leukocytes, neutrophils, lymphocytes and dNLR) evaluated by Spearman's correlation coefficients.**

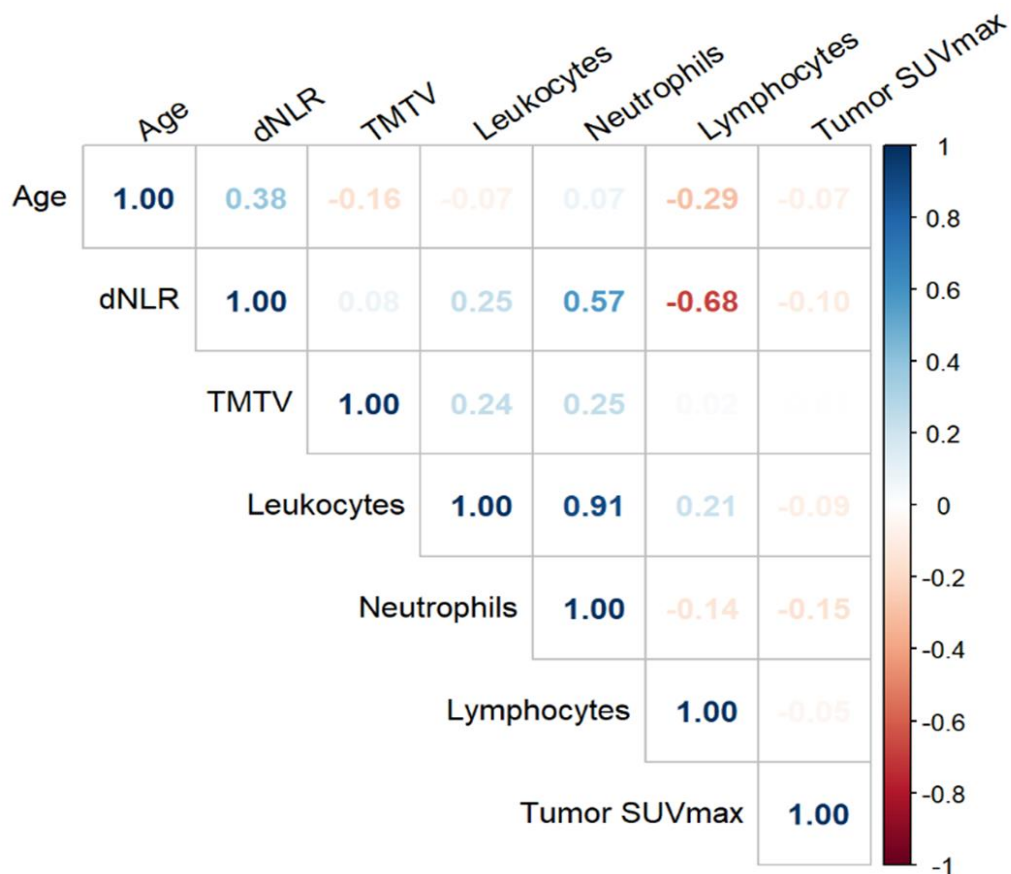

**Figure S3: Kaplan-Meier curves of Overall Survival (OS) (A) and Progression-Free Survival (PFS) (B) according to the derived Neutrophil-to-Lymphocyte Ratio (dNLR) in the chemotherapy (CT) cohort.**

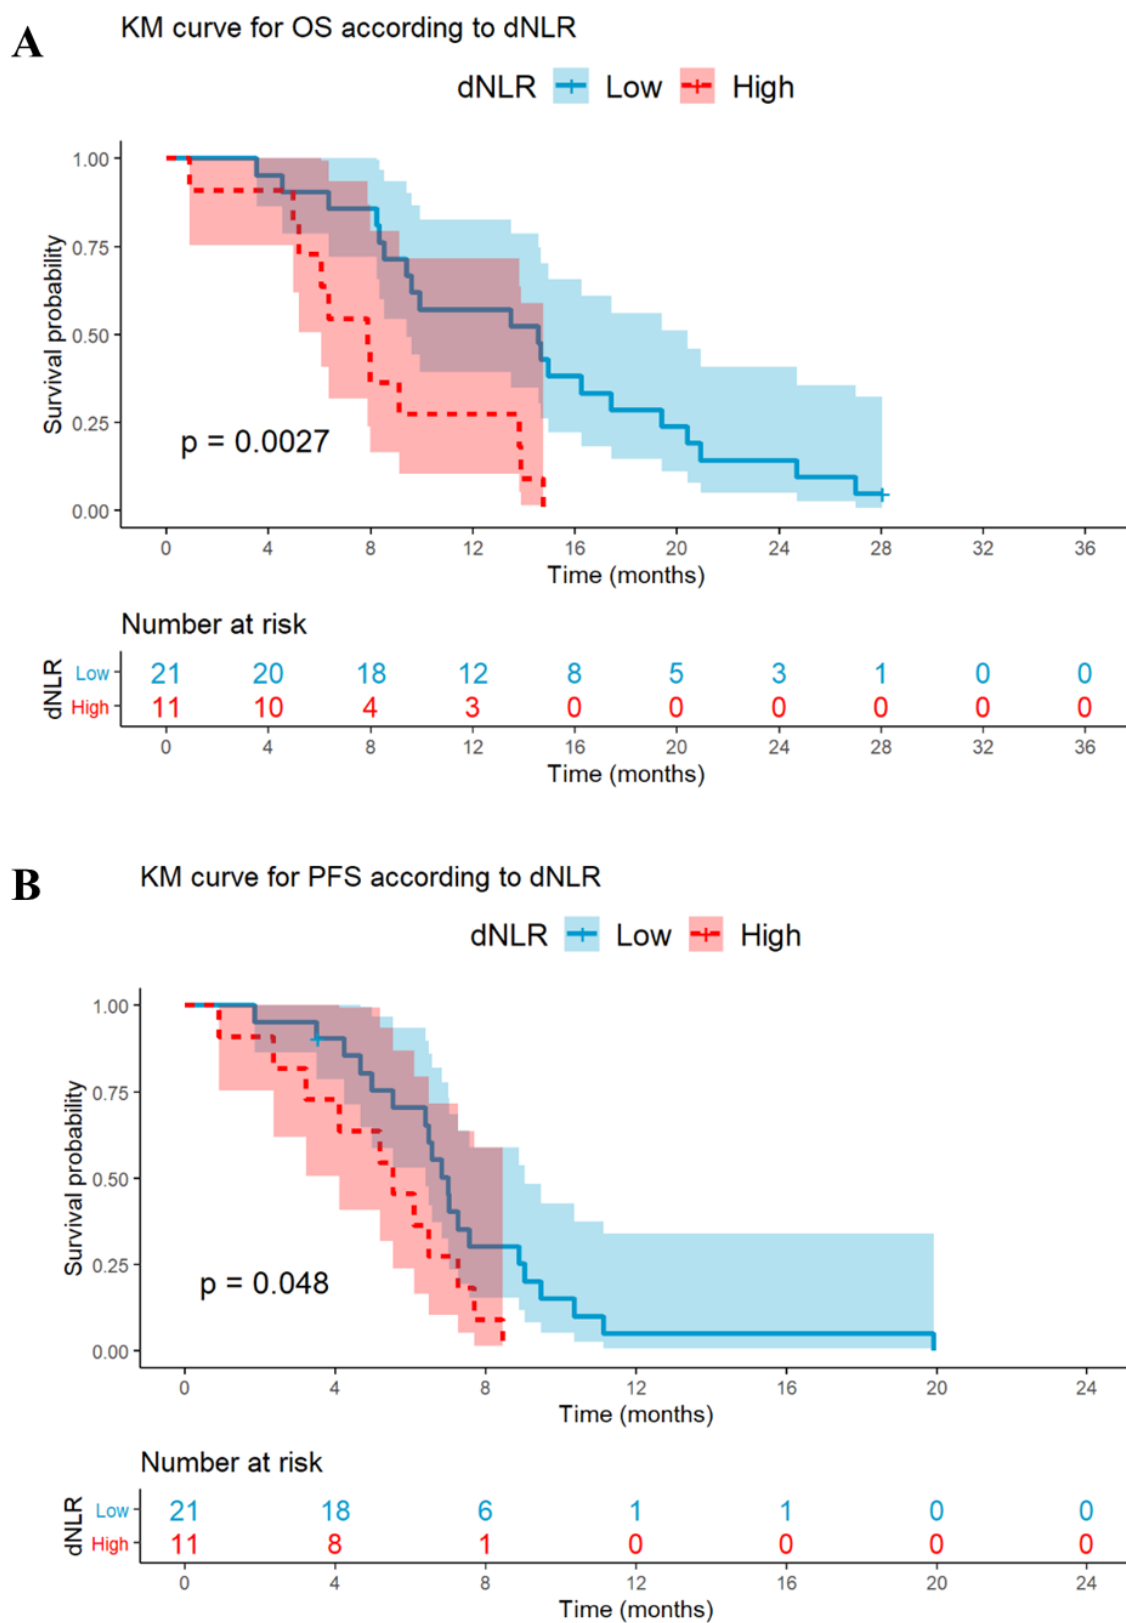



**Figure S4: Kaplan-Meier curves of Progression-Free Survival (PFS) based on total metabolic tumor volume (TMTV) and liver metastases (LM) status in the chemo-immunotherapy (CIT) cohort (A) and in the chemotherapy (CT) cohort (B).**

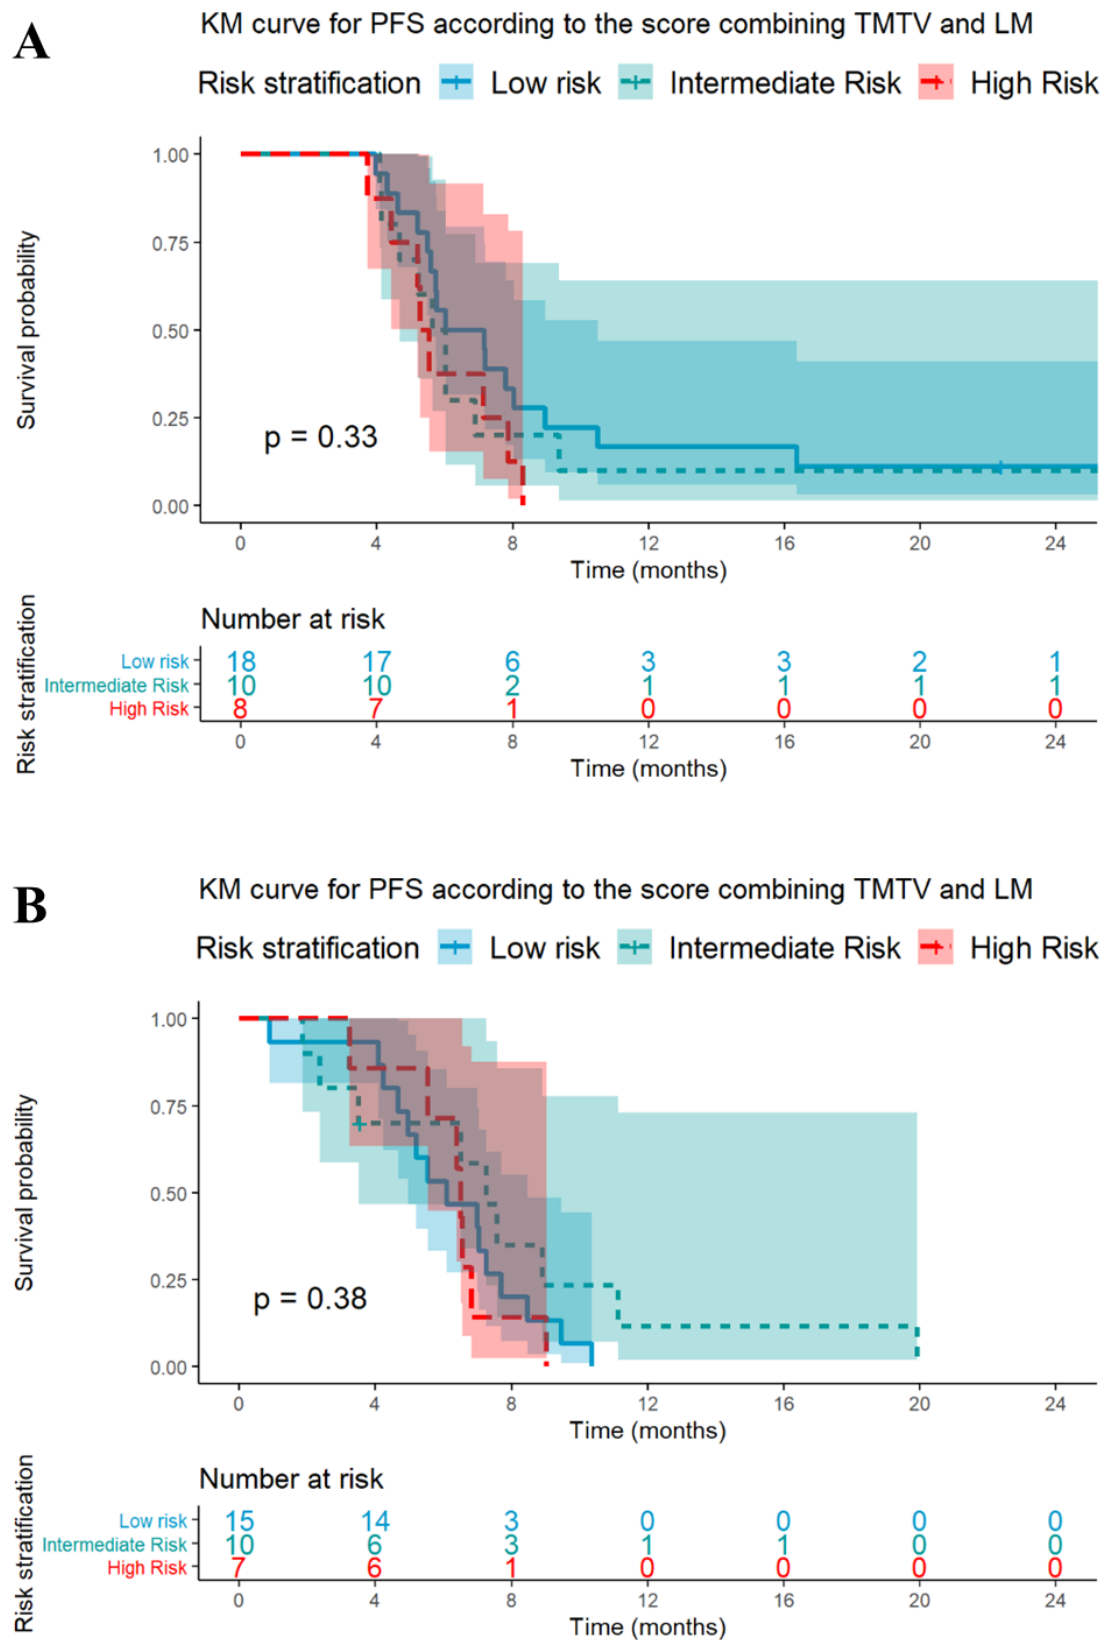

Supplement: s1 [file s1]
